# Supplementary material for: Novel Colloidal MoS2 Quantum Dot Heterojunctions on Silicon Platforms for Multifunctional Optoelectronic Devices
Source: PubMed Central journal article supplement (PMC4928078; doi:10.1038/srep29016), 2016-06-30
Supplement: srep29016-s1.pdf [file srep29016-s1.pdf]

# Electronic Supplementary Information (ESI)

## Novel Colloidal MoS<sub>2</sub> Quantum Dot Heterojunctions on Silicon Platforms for Multifunctional Optoelectronic Devices

S. Mukherjee<sup>1</sup>, R. Maiti<sup>2</sup>, A. Katiyar<sup>2</sup>, S. Das<sup>3</sup>, S. K. Ray<sup>2,#</sup>

<sup>1</sup>Advanced Technology Development Centre, <sup>2</sup>Department of Physics, <sup>3</sup>School of Medical Science & Technology, IIT Kharagpur, Kharagpur

#corresponding author: [physkr@phy.iitkgp.ernet](mailto:physkr@phy.iitkgp.ernet)

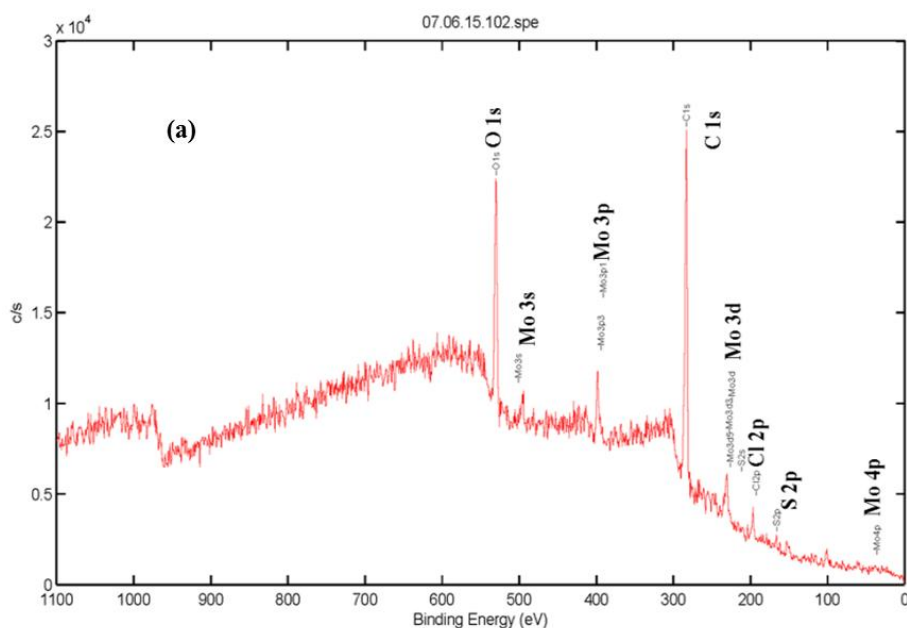

Fig. S1: Broad energy XPS survey spectrum of MoS<sub>2</sub> deposited on Si showing a weak but distinct signal of Cl 2p electrons. The presence of Cl as an impurity indicated an n-type doping in MoS<sub>2</sub> samples.

The excitonic Bohr radius of MoS<sub>2</sub> has been estimated using the following equation:

$$R_B = \frac{\hbar^2 \epsilon}{e^2} \left[ \frac{1}{m_e^*} + \frac{1}{m_h^*} \right] \quad \dots\dots\dots (S.1a)$$

Where,  $m_e^*$  and  $m_h^*$  are the effective masses of electrons and holes, respectively,  $\hbar$  is the reduced Planck's constant,  $e$  is the electronic charge and  $\epsilon$  is the relative permittivity of MoS<sub>2</sub>. The effective masses and the dielectric permittivity have been considering as  $m_h^* = 0.41m_0$  and

1  $m_e^* = 0.48m_0$ , as  $m_0$  is the rest mass of the electrons and  $\sim 11$ , respectively. Using eq S.1, the  
2 excitonic Bohr radius has been found as  $\sim 23$  nm.

3

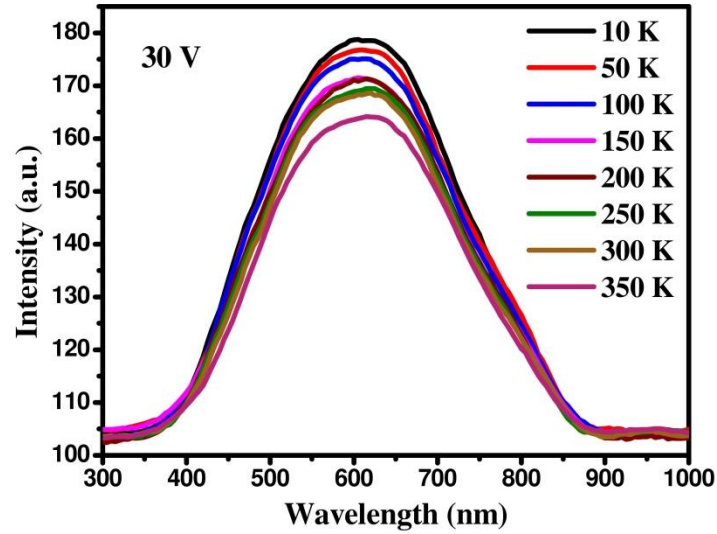

4

5 Fig. S2: (a) Temperature dependent electroluminescence (EL) spectra of Si/MoS<sub>2</sub> p-n  
6 heterojunction, recorded at 30 V applied bias.

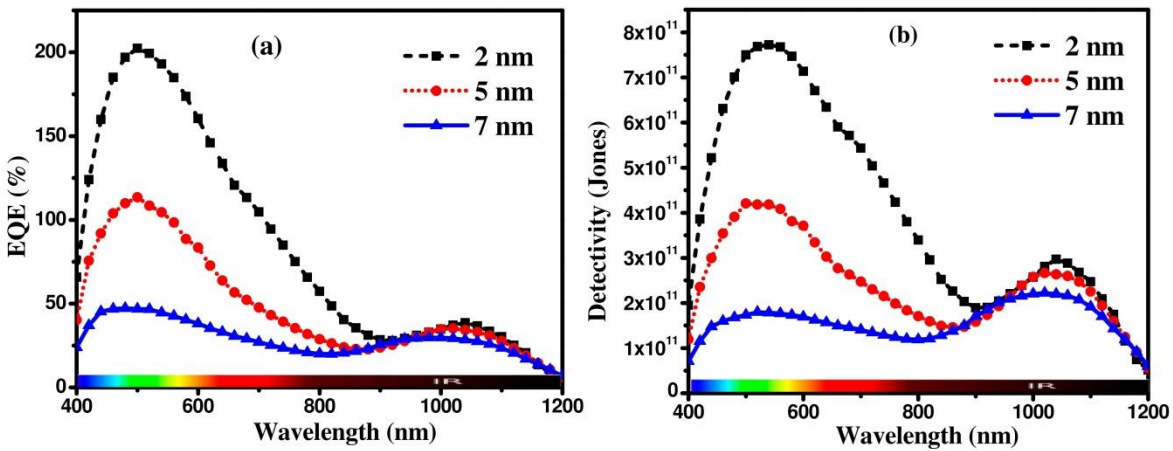

7

8 Fig. S3: (a) Spectral dependent external quantum efficiency (EQE) and (b) specific detectivity of  
9 different size MoS<sub>2</sub> quantum dot based devices exhibits PDs performances have been strongly  
10 dependent on the QDs size. All the spectra recorded at -2 V applied bias. The detectivity and the  
11 EQE both have been found  $\sim 4$ -fold improves with the reduction of QDs size from  $\sim 7$  nm to  $\sim 2$   
12 nm.
